# Supplementary material
Source: Research Square preprint supplement (doi:10.21203/rs.3.rs-9706268/v1)

**ANEXOS**:


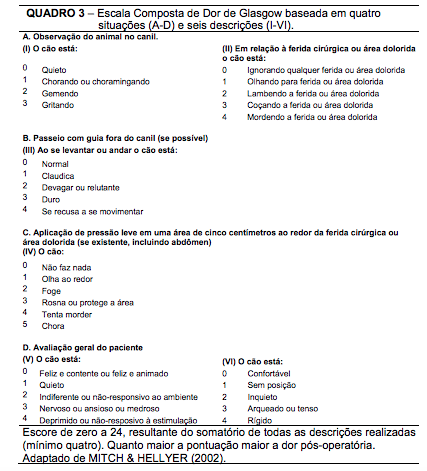

Supplement: Supplementary file 1 [file 17920a65f33b94035088cf89.docx]
